# Supplementary material for: Impact of a Telepsychiatry Program at Emergency Departments Statewide on the Quality, Utilization, and Costs of Mental Health Services
Source: Atypon-hosted journal article supplement (doi:10.1176/appi.ps.201400122), 2015-07-01
Supplement: appi.ps.201400122.ds001.pdf [file appi.ps.201400122.ds001.pdf]

**Appendix Table 1. Adjusted Utilization Outcomes for Emergency Department Telepsychiatry Patients Treated in South Carolina from March 2009-June 2013 including those that received telepsychiatry but did not have a matched control (N=16,327)**

| Outcome:                         | Estimated effect of telepsychiatry | 95% CI        | p-value |
|----------------------------------|------------------------------------|---------------|---------|
| Odds of admission (OR)           | .41                                | .19 -- .88    | .022    |
| LOS (days)                       | -.43                               | -.73 -- -.12  | .006    |
| Combined effect (days)           | -.87                               | -1.27 -- -.45 | <.001   |
| 30-day outpatient follow up (OR) | 5.55                               | 4.48 -- 6.86  | <.001   |
| 90-day outpatient follow up (OR) | 5.99                               | 4.87 -- 7.34  | <.001   |

OR: odds ratio  
p-values are derived from robust standard errors clustered at the hospital level (61 clusters)  
All models include hospital random effects and are adjusted for weekend versus weekday visit, sex, age, and race.

**Appendix Table 2. Adjusted Cost Outcomes for Emergency Department Telepsychiatry Patients Treated in South Carolina from March 2009-June 2013 including those that received telepsychiatry but did not have a matched control (N=16,327)**

| Outcome:                                                                              | Estimated effect of telepsychiatry | 95% CI              | p-value |
|---------------------------------------------------------------------------------------|------------------------------------|---------------------|---------|
| Inpatient costs in the 30 days following index ED visit                               | -\$1,586                           | -\$3,964 -- -\$791  | .191    |
| Total health care costs in the 30 days following index ED visit, index visit included | -\$368                             | -\$2,451 -- \$3,188 | .798    |

p-values are derived from robust standard errors clustered at the hospital level (61 clusters)  
 All models include hospital random effects and are adjusted for weekend versus weekday visit, sex, age, and race.
