# Supplementary material for: Impact of a Telepsychiatry Program at Emergency Departments Statewide on the Quality, Utilization, and Costs of Mental Health Services
Source: Atypon-hosted journal article supplement (doi:10.1176/appi.ps.201400122), 2015-07-01
Supplement: appi.ps.201400122.ds001.pdf [file appi.ps.201400122.ds001.pdf]

 


Psychiatry Online
